# Supplementary material
Source: publisher figshare collection journal article supplement (https://springernature.figshare.com/ndownloader/files/34067743)
Supplement: Supplementary file 1 [file 34067743]

**Online Appendix**

Table A1. Main model. Odds ratios and Standard Errors from Multilevel Random Intercept Logistic Regression analysis assessing associations between empowerment indicators, control variables and the personal support to FGM/C continuation.

| Covariates | Odds Ratio | | Std.Err. |
| --- | --- | --- | --- |
| Age | 0.992 | *** | 0.001 |
| Highest educational level: Primary (ref: None) | 0.734 | *** | 0.024 |
| Highest educational level: Secondary (ref: None) | 0.590 | *** | 0.019 |
| Highest educational level: Tertiary (ref: None) | 0.385 | *** | 0.018 |
| Daughters at home | 1.024 | ** | 0.009 |
| Age at first cohabitation | 0.988 | *** | 0.003 |
| Intimate partner violence justification: sometimes | 1.505 | *** | 0.040 |
| Intimate partner violence justification: often or always | 1.737 | *** | 0.045 |
| Ideal number of children | 1.003 | *** | 0.000 |
| Person who usually decides on visits to family or relatives: Respondent alone (ref. respondent and husband/partner) | 1.104 | ** | 0.035 |
| Person who usually decides on visits to family or relatives: Someone else (ref. Respondent and husband/partner) | 1.163 | *** | 0.029 |
| Unmet need for contraception: no need (ref: yes) | 0.949 |  | 0.031 |
| Unmet need for contraception: using method (ref: yes) | 1.004 |  | 0.025 |
| Religion: No religion (ref. Muslim) | 1.188 |  | 0.112 |
| Religion: Christian (ref. Muslim) | 0.470 | *** | 0.020 |
| Religion: Traditional/animist (ref. Muslim) | 0.897 |  | 0.055 |
| Respondent works: yes, unpaid work (ref: No) | 0.958 |  | 0.040 |
| Respondent works: yes, paid work (ref: No) | 0.980 |  | 0.025 |
| Experience of FGM: Yes (ref. No) | 8.221 | *** | 0.285 |
| Experience of FGM: Unsure (ref. No) | 3.196 |  | 0.232 |
| Regional FGM/C prevalence | 1.008 |  | 0.005 |
| Country: Burkina Faso (ref. Egypt) | 0.044 | *** | 0.013 |
| Country: Ivory Coast (ref. Egypt) | 0.189 | *** | 0.065 |
| Country: Ethiopia (ref. Egypt) | 0.168 | *** | 0.051 |
| Country: Mali (ref. Egypt) | 1.065 |  | 0.358 |
| Country: Nigeria (ref. Egypt) | 1.084 |  | 0.436 |
| Country: Togo (ref. Egypt) | 0.069 | *** | 0.035 |
| Constant | 0.186 |  | 0.088 |
| estimated residual standard deviation of the random intercept | 0.574 |  | 0.059 |
| estimated residual intraclass correlation of the latent responses | 0.091 |  | 0.017 |
| Number of observations | 73,985 | | |
| Number of groups | 59 | | |
| Log-likelihood | -32005.862 | | |
| AIC | 64073.72 | | |

*Notes: LR test of rho=0: chibar2(01) = 1796.03 Prob >= chibar2 = 0.000*

**p < 0.05 **p < 0.01 ***p < 0.001*

**Additional models for consistency check**

*Models by FGM/C experience*

Table A2. Odds ratios and Standard Errors from Multilevel Random Intercept Logistic Regression analysis assessing associations between empowerment indicators, control variables and the personal support to FGM/C continuation among women who underwent FGM/C or are unsure about their experience

| Covariates | Odds Ratio |  | Std.Err. |
| --- | --- | --- | --- |
| Age | 0.991 | *** | 0.001 |
| Highest educational level: Primary (ref: None) | 0.769 | *** | 0.028 |
| Highest educational level: Secondary (ref: None) | 0.578 | *** | 0.020 |
| Highest educational level: Tertiary (ref: None) | 0.361 | *** | 0.019 |
| Daughters at home | 1.030 | ** | 0.011 |
| Age at first cohabitation | 0.986 | *** | 0.003 |
| Intimate partner violence justification: sometimes | 1.459 | *** | 0.043 |
| Intimate partner violence justification: often or always | 1.707 | *** | 0.050 |
| Ideal number of children | 1.002 | *** | 0.001 |
| Person who usually decides on visits to family or relatives: Respondent alone (ref. respondent and husband/partner) | 1.097 | ** | 0.036 |
| Person who usually decides on visits to family or relatives: Someone else (ref. Respondent and husband/partner) | 1.132 | *** | 0.031 |
| Unmet need for contraception: no need (ref: yes) | 0.952 |  | 0.033 |
| Unmet need for contraception: using method (ref: yes) | 1.010 |  | 0.027 |
| Religion: No religion (ref. Muslim) | 0.849 |  | 0.088 |
| Religion: Christian (ref. Muslim) | 0.345 | *** | 0.039 |
| Religion: Traditionnal/animist (ref. Muslim) | 0.799 |  | 0.095 |
| Religion: 99 (ref. Muslim) | 0.646 |  | 0.221 |
| The respondent work : unpaid work (ref: No) | 0.997 |  | 0.045 |
| The respondent work : paid work (ref: No) | 1.014 |  | 0.030 |
| Regional FGM prevalence | 1.010 | * | 0.005 |
| Burkina Faso | 0.040 | *** | 0.011 |
| Ivory Coast | 0.193 | *** | 0.067 |
| Ethiopia | 0.142 | *** | 0.043 |
| Mali | 1.008 |  | 0.336 |
| Nigeria | 1.067 |  | 0.429 |
| Togo | 0.071 | *** | 0.037 |
| Constant | 1.776 |  | 0.869 |
| estimated residual standard deviation of the random intercept | 0.569 |  | 0.060 |
| estimated residual intraclass correlation of the latent responses | 0.090 |  | 0.017 |
| Number of observations | 73,985 | | |
| Number of groups | 59 | | |
| Log-likelihood | -25827.405 | | |
| AIC | 51710.81 | | |

Notes: LR test of rho=0: chibar2(01) = 1457.21 Prob >= chibar2 = 0.000

**p < 0.05 **p < 0.01 ***p < 0.001*

Table A3. Odds ratios and Standard Errors from Multilevel Random Intercept Logistic Regression analysis assessing associations between empowerment indicators, control variables and the personal support to FGM/C continuation among women who never underwent FGM/C

| Covariates | Odds Ratio |  | Std.Err. |
| --- | --- | --- | --- |
| Age | 0.995 | *** | 0.003 |
| Highest educational level: Primary (ref: None) | 0.543 | *** | 0.047 |
| Highest educational level: Secondary (ref: None) | 0.554 | *** | 0.052 |
| Highest educational level: Tertiary (ref: None) | 0.471 | *** | 0.068 |
| Daughters at home | 1.002 | ** | 0.023 |
| Age at first cohabitation | 0.988 | *** | 0.008 |
| Intimate partner violence justification: sometimes | 1.965 | *** | 0.139 |
| Intimate partner violence justification: often or always | 2.115 | *** | 0.134 |
| Ideal number of children | 1.005 | *** | 0.001 |
| Person who usually decides on visits to family or relatives: Respondent alone (ref. respondent and husband/partner) | 1.040 | ** | 0.127 |
| Person who usually decides on visits to family or relatives: Someone else (ref. Respondent and husband/partner) | 1.365 | *** | 0.088 |
| Unmet need for contraception: no need (ref: yes) | 1.080 |  | 0.117 |
| Unmet need for contraception: using method (ref: yes) | 1.128 |  | 0.106 |
| Religion: No religion (ref. Muslim) | 0.668 |  | 0.174 |
| Religion: Christian (ref. Muslim) | 0.571 | *** | 0.149 |
| Religion: Traditionnal/animist (ref. Muslim) | 0.650 |  | 0.179 |
| Religion: 99 (ref. Muslim) | 0.485 |  | 0.252 |
| The respondent work : unpaid work (ref: No) | 0.801 |  | 0.103 |
| The respondent work : paid work (ref: No) | 0.958 |  | 0.058 |
| Regional FGM prevalence | 1.009 | * | 0.007 |
| Burkina Faso | 0.068 | *** | 0.029 |
| Ivory Coast | 0.209 | *** | 0.099 |
| Ethiopia | 0.424 | *** | 0.183 |
| Mali | 0.753 |  | 0.334 |
| Nigeria | 0.903 |  | 0.478 |
| Togo | 0.110 | *** | 0.075 |
| Constant | 0.110 |  | 0.079 |
| estimated residual standard deviation of the random intercept | 0.694 |  | 0.092 |
| estimated residual intraclass correlation of the latent responses | 0.128 |  | 0.029 |
| Number of observations | 23,641 | | |
| Number of groups | 53 | | |
| Log-likelihood | -5188.5592 | | |
| AIC | 10433.12 | | |

LR test of rho=0: chibar2(01) = 366.71 Prob >= chibar2 = 0.000

**p < 0.05 **p < 0.01 ***p < 0.001*

**Models by decision-making domains**

Table A4. Odds ratios and Standard Errors from Multilevel Random Intercept Logistic Regression analysis assessing associations between empowerment indicators, control variables and the personal support to FGM/C continuation among women who never underwent FGM/C

| Covariates | Odds Ratio |  | Std.Err. |
| --- | --- | --- | --- |
| Age | 0.992 | *** | 0.001 |
| Highest educational level: Primary (ref: None) | 0.733 | *** | 0.024 |
| Highest educational level: Secondary (ref: None) | 0.588 | *** | 0.018 |
| Highest educational level: Tertiary (ref: None) | 0.382 | *** | 0.018 |
| Daughters at home | 1.024 | ** | 0.009 |
| Age at first cohabitation | 0.988 | *** | 0.003 |
| Intimate partner violence justification: sometimes | 1.507 | *** | 0.041 |
| Intimate partner violence justification: often or always | 1.742 | *** | 0.045 |
| Ideal number of children | 1.003 | *** | 0.000 |
| **Person who usually decides on respondent’s health care: Respondent alone (ref. respondent and husband/partner)** | 1.120 | ** | 0.037 |
| **Person who usually decides on respondent’s health care: Someone else (ref. Respondent and husband/partner)** | 1.123 | *** | 0.030 |
| Unmet need for contraception: no need (ref: yes) | 0.948 |  | 0.031 |
| Unmet need for contraception: using method (ref: yes) | 1.004 |  | 0.025 |
| Religion: No religion (ref. Muslim) | 1.188 |  | 0.112 |
| Religion: Christian (ref. Muslim) | 0.470 | *** | 0.020 |
| Religion: Traditional/animist (ref. Muslim) | 0.895 |  | 0.055 |
| Religion: 99 (ref. Muslim) | 0.638 |  | 0.160 |
| The respondent work : unpaid work (ref: No) | 0.954 |  | 0.040 |
| The respondent work : paid work (ref: No) | 0.978 |  | 0.025 |
| Experience of FGM: Yes (ref. No) | 8.248 | *** | 0.286 |
| Experience of FGM: Unsure (ref. No) | 3.197 |  | 0.232 |
| Regional FGM prevalence | 1.008 |  | 0.005 |
| Burkina Faso | 0.044 | *** | 0.013 |
| Ivory Coast | 0.189 | *** | 0.065 |
| Ethiopia | 0.166 | *** | 0.051 |
| Mali | 1.069 |  | 0.360 |
| Nigeria | 1.077 |  | 0.433 |
| Togo | 0.068 | *** | 0.034 |
| Constant | 0.190 |  | 0.090 |
| estimated residual standard deviation of the random intercept | 0.575 |  | 0.059 |
| estimated residual intraclass correlation of the latent responses | 0.091 |  | 0.017 |
| Number of observations | 73,985 | | |
| Number of groups | 59 | | |
| Log-likelihood | -32005.862 | | |
| AIC | 64091.9 | | |

LR test of rho=0: chibar2(01) = 1807.81 Prob >= chibar2 = 0.000

**p < 0.05 **p < 0.01 ***p < 0.001*

Table A5. Odds ratios and Standard Errors from Multilevel Random Intercept Logistic Regression analysis assessing associations between empowerment indicators, control variables and the personal support to FGM/C continuation among women who never underwent FGM/C

| Covariates | Odds Ratio |  | Std.Err. |
| --- | --- | --- | --- |
| Age | 0.992 | *** | 0.001 |
| Highest educational level: Primary (ref: None) | 0.735 | *** | 0.024 |
| Highest educational level: Secondary (ref: None) | 0.590 | *** | 0.019 |
| Highest educational level: Tertiary (ref: None) | 0.384 | *** | 0.018 |
| Daughters at home | 1.024 | ** | 0.009 |
| Age at first cohabitation | 0.988 | *** | 0.003 |
| Intimate partner violence justification : sometimes | 1.503 | *** | 0.040 |
| Intimate partner violence justification : often or always | 1.737 | *** | 0.045 |
| Ideal number of children | 1.003 | *** | 0.000 |
| **Person who usually decides on large household purchases: Respondent alone (ref. respondent and husband/partner)** | 1.088 | * | 0.044 |
| **Person who usually decides large household purchases: Someone else (ref. Respondent and husband/partner)** | 1.144 | *** | 0.028 |
| Unmet need for contraception: no need (ref: yes) | 0.949 |  | 0.031 |
| Unmet need for contraception: using method (ref: yes) | 1.002 |  | 0.025 |
| Religion: No religion (ref. Muslim) | 1.185 |  | 0.112 |
| Religion: Christian (ref. Muslim) | 0.470 | *** | 0.020 |
| Religion: Traditionnal/animist (ref. Muslim) | 0.898 |  | 0.055 |
| Religion: 99 (ref. Muslim) | 0.633 |  | 0.158 |
| The respondent work : unpaid work (ref: No) | 0.959 |  | 0.040 |
| The respondent work : paid work (ref: No) | 0.983 |  | 0.025 |
| Experience of FGM: Yes (ref. No) | 8.230 | *** | 0.285 |
| Experience of FGM: Unsure (ref. No) | 3.198 |  | 0.232 |
| Regional FGM prevalence | 1.008 |  | 0.005 |
| Burkina Faso | 0.044 | *** | 0.013 |
| Ivory Coast | 0.189 | *** | 0.066 |
| Ethiopia | 0.168 | *** | 0.051 |
| Mali | 1.074 |  | 0.361 |
| Nigeria | 1.078 |  | 0.433 |
| Togo | 0.069 | *** | 0.034 |
| Constant | 0.186 |  | 0.088 |
| estimated residual standard deviation of the random intercept | 0.574 |  | 0.059 |
| estimated residual intraclass correlation of the latent responses | 0.091 |  | 0.017 |
| Number of observations | 73,974 | | |
| Number of groups | 59 | | |
| Log-likelihood | -31998.787 | | |
| AIC | 64059.57 | | |

LR test of rho=0: chibar2(01) = 1785.62 Prob >= chibar2 = 0.000

**p < 0.05 **p < 0.01 ***p < 0.001*

**Additional figures**

Figure A1. Predicted probabilities of supporting FGM continuation by age at first cohabitation

Note: Other variables are at their mean level

Figure A2. Predicted probabilities of supporting FGM continuation by the respondent’s ideal number of children

Note: Other variables are at their mean level

Figure A3. Predicted probabilities of supporting FGM continuation by the respondent’s job status

Note: Other variables are at their mean level

Figure A4. Predicted probabilities of supporting FGM continuation by the need for contraception

Note: Other variables are at their mean level
